# Supplementary material
Source: PubMed Central journal article supplement (PMC3590113)
Supplement: NIHMS396204-supplement-Supplement1.pdf [file NIHMS396204-supplement-Supplement1.pdf]

## Supplementary Appendix

This appendix has been provided by the authors to give readers additional information about their work.

Supplement to: Nielsen-Saines K, Watts DH, Veloso VG, et al. Three postpartum antiretroviral regimens to prevent intrapartum HIV infection. *N Engl J Med* 2012;366:2368-79.

Appendix- Table of Contents:

|                                                                                                                      |          |
|----------------------------------------------------------------------------------------------------------------------|----------|
| Table of Contents:                                                                                                   | p. 1     |
| Table 1 complete: Demographic and baseline characteristics by study treatment arm for infants and mothers            | pp. 2-4  |
| Table 3 complete: Relationship of intrapartum HIV-1 infection with maternal demographic and clinical characteristics | pp. 5-6  |
| Appendix 1: Flow diagram of enrollments                                                                              | pp. 7-8  |
| Appendix 2: Mortality Table                                                                                          | pp. 9-11 |
| Appendix 3: Grade 2 or higher laboratory abnormalities overall and by study arm                                      | p. 12    |
| Appendix 4: SAE by System Organ Class and Study Treatment Arm                                                        | pp.13-14 |
| Acknowledgments:                                                                                                     | p. 15    |

Table 1. Demographic and baseline characteristics by study treatment arm for infants and mothers.

|                                                                          | Overall<br>(N=1684)<br>n (%) | ZDV<br>(N=566)<br>n (%) | ZDV+NPV<br>(N=562)<br>n (%) | ZDV+3TC/NFV<br>(N=556)<br>n (%) | p value <sup>1</sup> |
|--------------------------------------------------------------------------|------------------------------|-------------------------|-----------------------------|---------------------------------|----------------------|
| Study treatment arm <sup>2</sup>                                         |                              |                         |                             |                                 |                      |
| ZDV                                                                      | 566 (33.61)                  |                         |                             |                                 |                      |
| ZDV+NVP                                                                  | 562 (33.37)                  |                         |                             |                                 |                      |
| ZDV+3TC+NFV                                                              | 556 (33.02)                  |                         |                             |                                 |                      |
| Median time of study ARV delivery <sup>3</sup><br>(Range)                |                              | 29 hours<br>(2- 48)     | 28 hours<br>(3- 48)         | 29 hours<br>(3- 48)             |                      |
| Inadvertent enrollments                                                  |                              |                         |                             |                                 |                      |
| Mother HIV- on confirmatory testing                                      | 51/1735 (2.9)                | 15/581 (2.6)            | 18/580 (3.1)                | 18/574 (3.1)                    | 0.8346               |
| Unknown HIV status<br>(deceased or discontinued before primary endpoint) | 97 (5.8)                     | 31 (5.5)                | 33 (5.9)                    | 33 (5.9)                        | 0.9600               |
| Maternal age (years)                                                     |                              |                         |                             |                                 |                      |
| Median (min-max)                                                         | 26 (13-47)                   | 26 (13-43)              | 26 (14-47)                  | 26 (14-45)                      | 0.8570               |
| 13-24                                                                    | 658 (39.54)                  | 218 (38.72)             | 207 (37.16)                 | 233 (42.83)                     | 0.1510               |
| 25-29                                                                    | 470 (28.25)                  | 166 (29.48)             | 171 (30.70)                 | 133 (24.45)                     |                      |
| 30 and older                                                             | 536 (32.21)                  | 179 (31.79)             | 179 (32.14)                 | 178 (32.72)                     |                      |
| Race/Ethnicity                                                           |                              |                         |                             |                                 |                      |
| Black                                                                    | 819 (49.22)                  | 273 (48.49)             | 283 (50.81)                 | 263 (48.35)                     | 0.4955               |
| Mixed/Mulatto                                                            | 451 (27.10)                  | 145 (25.75)             | 147 (26.39)                 | 159 (29.23)                     |                      |
| White/Others                                                             | 394 (23.68)                  | 145 (25.75)             | 127 (22.80)                 | 122 (22.43)                     |                      |
| Alcohol use frequency                                                    |                              |                         |                             |                                 |                      |
| ≥1/week                                                                  | 279 (16.93)                  | 93 (16.70)              | 94 (17.03)                  | 92 (17.07)                      | 0.0531               |
| Never                                                                    | 1058 (64.20)                 | 378 (67.86)             | 358 (64.86)                 | 322 (59.74)                     |                      |
| ≥5 alcoholic drinks/day                                                  | 235 (14.33)                  | 73 (13.11)              | 80 (14.57)                  | 82 (15.36)                      | 0.5588               |
| Illegal Substance use in pregnancy                                       |                              |                         |                             |                                 |                      |
| Yes                                                                      | 147 ( 8.88)                  | 43 ( 7.68)              | 62 (11.21)                  | 42 ( 7.75)                      | 0.0617               |
| Tobacco use frequency                                                    |                              |                         |                             |                                 |                      |
| >10 cig/day                                                              | 167 (10.11)                  | 58 (10.38)              | 57 (10.31)                  | 52 ( 9.63)                      | 0.0681               |
| 6-10 cig/day                                                             | 129 ( 7.81)                  | 30 ( 5.37)              | 57 (10.31)                  | 42 ( 7.78)                      |                      |
| ≤5 cig/day                                                               | 237 (14.35)                  | 79 (14.13)              | 86 (15.55)                  | 72 (13.33)                      |                      |
| Never                                                                    | 1119 (67.74)                 | 392 (70.13)             | 353 (63.83)                 | 374 (69.26)                     |                      |
| Viral load (copies/mL)                                                   |                              |                         |                             |                                 |                      |
| >100,000                                                                 | 226 (13.65)                  | 71 (12.70)              | 82 (14.80)                  | 73 (13.44)                      | 0.4887               |

|                                                            |                  |                  |                  |                  |        |
|------------------------------------------------------------|------------------|------------------|------------------|------------------|--------|
| 10,000-100,000                                             | 726 (43.84)      | 254 (45.44)      | 247 (44.58)      | 225 (41.44)      |        |
| ≤10,000                                                    | 704 (42.51)      | 234 (41.86)      | 225 (40.61)      | 245 (45.12)      |        |
| Log <sub>10</sub> viral load <sup>4</sup> Median (min-max) | 4.17 (1.65-6.78) | 4.17 (1.65-6.78) | 4.20 (1.84-6.36) | 4.13 (1.86-6.49) | 0.2936 |
| CD4 counts (cells/mm <sup>3</sup> )                        |                  |                  |                  |                  |        |
| <200                                                       | 191 (11.70)      | 67 (12.23)       | 55 (10.07)       | 69 (12.80)       | 0.3339 |
| 200 to 350                                                 | 358 (21.92)      | 115 (20.99)      | 137 (25.09)      | 106 (19.67)      |        |
| 351 to 500                                                 | 358 (21.92)      | 115 (20.99)      | 120 (21.98)      | 123 (22.82)      |        |
| >500                                                       | 726 (44.46)      | 251 (45.80)      | 234 (42.86)      | 241 (44.71)      |        |
| CD4 count Median (min-max)                                 | 459(12-2678)     | 471(31-1748)     | 447(12-2678)     | 458 (23-2556)    | 0.8327 |
| Attended prenatal care                                     | 1038 (62.61)     | 343 (61.25)      | 341 (61.44)      | 354 (65.19)      | 0.3144 |
| At least 3 prenatal care visits                            | 790 (47.48)      | 263 (47.05)      | 251 (45.39)      | 276 (50.00)      | 0.2986 |
| ZDV during labor                                           | 682 (40.99)      | 227 (40.32)      | 231 (41.47)      | 224 (41.18)      | 0.9204 |
| Maternal Syphilis                                          | 151 ( 9.29)      | 49 ( 8.93)       | 56 (10.28)       | 46 ( 8.65)       | 0.6138 |
| Timing of Maternal diagnosis                               |                  |                  |                  |                  |        |
| Labor and delivery via HIV-1 rapid testing                 | 1230 (73.04)     | 416 (33.82)      | 415 (33.74)      | 399 (32.44)      | 0.7028 |
| Prior to labor with 2 + serology results                   | 454 (26.96)      | 150 (33.04)      | 147 (32.28)      | 157 (34.58)      |        |
| Region                                                     |                  |                  |                  |                  |        |
| Americas                                                   | 1198 (72)        | 407 (72.29)      | 399 (71.63)      | 392 (72.06)      | 0.9696 |
| South Africa                                               | 466 (28)         | 156 (27.71)      | 158 (28.37)      | 152 (27.94)      |        |
| Type of delivery                                           |                  |                  |                  |                  |        |
| Cesarean before rupture                                    | 395 (23.47)      | 132 (23.32)      | 131 (23.35)      | 132 (23.74)      | 0.9831 |
| Vaginal + cesarean after rupture                           | 1288 (76.53)     | 434 (76.68)      | 430 (76.65)      | 424 (76.26)      |        |
| Gestational age                                            |                  |                  |                  |                  |        |
| Median (min-max)                                           | 39 (32-42)       | 39 (32-42)       | 39 (32-42)       | 39 (32-42)       | 0.7630 |
| 37 or more                                                 | 1509 (89.61)     | 510 (90.11)      | 509 (90.57)      | 490 (88.13)      | 0.3654 |
| Breastfed at birth only                                    |                  |                  |                  |                  |        |
| Yes                                                        | 155 (9.35)       | 47 (8.39)        | 54 (9.75)        | 54 (9.94)        |        |
| No                                                         | 1502 (90.65)     | 513 (91.61)      | 500 (90.25)      | 489 (90.06)      | 0.6267 |
| Breastfed at any visit                                     |                  |                  |                  |                  |        |
| Yes                                                        | 178 (10.74)      | 54 (9.64)        | 64 (11.55)       | 60 (11.05)       |        |

|                                                     |                     |                        |                     |                     |        |
|-----------------------------------------------------|---------------------|------------------------|---------------------|---------------------|--------|
| No                                                  | 1479 (89.26)        | 506 (90.36)            | 490 (88.45)         | 483 (88.95)         | 0.5659 |
| Apgar scores                                        |                     |                        |                     |                     |        |
| Median (min-max)                                    | 9 (1-10)            | 9 (1-10)               | 9 (1-10)            | 9 (6-10)            | 0.7311 |
| 7-10                                                | 1482 (88.00)        | 503 (88.87)            | 495 (88.08)         | 484 (87.05)         | 0.8716 |
| Not done                                            | 191 (11.34)         | 59 (10.42)             | 63 (11.21)          | 69 (12.41)          |        |
| Median birth weight (gram)                          |                     |                        |                     |                     |        |
| (min-max)                                           | 3000<br>(1510-4850) | 3020.00<br>(1510-4385) | 3000<br>(1595-4850) | 2985<br>(1570-4300) | 0.8058 |
| Time of membrane rupture to infant delivery (hours) |                     |                        |                     |                     |        |
| Median (min-max)                                    | 0.08 (1-114.92)     | 0.09 (0-60.57)         | 0.08 (0-114.92)     | 0.08 (0-105.42)     | 0.1421 |

<sup>1</sup> Pearson chi-square tests were used to calculate p-values.

<sup>2</sup> N=1684 is the total number of infants. Due to 20 pairs of twin babies, the total number of mothers was 1664.

<sup>3</sup> Non-study standard of care ZDV initiated before study regimen in 2/3 of subjects.

<sup>4</sup> Viral load  $\leq$  400 copies/mL was recoded as 400 over square root of two.

Table 3. Relationship of intrapartum HIV-1 infection with maternal demographic and clinical characteristics

|                                               | Infected<br>n (%) | Uninfected<br>n (%) | Unadjusted         |          | Adjusted <sup>1</sup> |         |
|-----------------------------------------------|-------------------|---------------------|--------------------|----------|-----------------------|---------|
|                                               |                   |                     | OR (95% CI)        | p-value  | OR (95% CI)           | p-value |
| <b>Study Treatment Arm</b>                    |                   |                     |                    |          |                       |         |
| ZDV+3TC/NFV                                   | 12 ( 2.27)        | 516 (97.73)         | 0.49 (0.24 - 0.99) | 0.0465   | 0.50 (0.24-1.01)      | 0.0539  |
| ZDV+NVP                                       | 11 ( 2.06)        | 523 (97.94)         | 0.44 (0.21 - 0.91) | 0.0273   | 0.39 (0.19-0.82)      | 0.0128  |
| ZDV                                           | 24 ( 4.54)        | 505 (95.46)         | 1.00               |          | 1.00                  |         |
| <b>Age (years)</b>                            |                   |                     |                    |          |                       |         |
| 13 to 24                                      | 20 ( 3.19)        | 607 (96.81)         | 0.85 (0.45 - 1.60) | 0.6087   |                       |         |
| 25 to 29                                      | 8 ( 1.83)         | 429 (98.17)         | 0.48 (0.21 - 1.11) | 0.0844   |                       |         |
| 30 and older                                  | 19 ( 3.75)        | 488 (96.25)         | 1.00               |          |                       |         |
| <b>Race/ethnicity</b>                         |                   |                     |                    |          |                       |         |
| Black                                         | 29 ( 3.74)        | 747 (96.26)         | 1.56 (0.73 - 3.32) | 0.2524   |                       |         |
| Mixed/mulatto                                 | 9 ( 2.12)         | 416 (97.88)         | 0.87 (0.34 - 2.21) | 0.7662   |                       |         |
| White and other                               | 9 ( 2.43)         | 361 (97.57)         | 1.00               |          |                       |         |
| <b>Race/ethnicity</b>                         |                   |                     |                    |          |                       |         |
| Black/ Mixed/mulatto                          | 38 ( 3.16)        | 1163 (96.84)        | 1.31 (0.63 - 2.74) | 0.4717   |                       |         |
| White and other                               | 9 ( 2.43)         | 361 (97.57)         | 1.00               |          |                       |         |
| <b>Alcohol use frequency</b>                  |                   |                     |                    |          |                       |         |
| ≥1/week                                       | 12 ( 4.62)        | 248 (95.38)         | 1.62 (0.82 - 3.23) | 0.1669   |                       |         |
| >1/month, <1/week                             | 3 ( 2.70)         | 108 (97.30)         | 0.93 (0.28 - 3.11) | 0.9088   |                       |         |
| ≤1/month                                      | 3 ( 1.63)         | 181 (98.37)         | 0.56 (0.17 - 1.84) | 0.3376   |                       |         |
| Never                                         | 29 ( 2.89)        | 973 (97.11)         | 1.00               |          |                       |         |
| <b>≥5 or more alcoholic drinks/day</b>        |                   |                     |                    |          |                       |         |
| Yes                                           | 9 ( 4.05)         | 213 (95.95)         | 1.44 (0.69 - 3.02) | 0.3368   |                       |         |
| No                                            | 38 ( 2.85)        | 1293 (97.15)        | 1.00               |          |                       |         |
| <b>Illegal Substance use during pregnancy</b> |                   |                     |                    |          |                       |         |
| Yes                                           | 7 ( 5.11)         | 130 (94.89)         | 1.87 (0.82 - 4.25) | 0.1374   | 2.51 (1.08-5.86)      | 0.0328  |
| <b>Tobacco use frequency</b>                  |                   |                     |                    |          |                       |         |
| >10 cig/day                                   | 5 ( 3.18)         | 152 (96.82)         | 1.16 (0.44 - 3.05) | 0.7609   |                       |         |
| 6-10 cig/day                                  | 1 ( 0.82)         | 121 (99.18)         | 0.29 (0.04 - 2.16) | 0.2280   |                       |         |
| ≤5 cig/day                                    | 12 ( 5.26)        | 216 (94.74)         | 1.96 (0.99 - 3.91) | 0.0551   |                       |         |
| Never                                         | 29 ( 2.75)        | 1024 (97.25)        | 1.00               |          |                       |         |
| <b>Viral load (copies/mL)</b>                 |                   |                     |                    |          |                       |         |
| Log <sub>10</sub> Viral Load                  |                   |                     | 2.16 (1.49 - 3.13) | < 0.0001 | 2.28 (1.56-3.35)      | <0.0001 |
| <b>CD4+ count (cells/mm<sup>3</sup>)</b>      |                   |                     |                    |          |                       |         |
|                                               |                   |                     | 0.90 (0.81-1.01)   | 0.0768   |                       |         |

|                                                                  |            |              |                    |        |
|------------------------------------------------------------------|------------|--------------|--------------------|--------|
| Prenatal care                                                    |            |              |                    |        |
| No                                                               | 18 ( 3.04) | 574 (96.96)  | 1.02 (0.56 - 1.86) | 0.9433 |
| Yes                                                              | 29 ( 2.98) | 945 (97.02)  | 1.00               |        |
| ZDV during labor                                                 |            |              |                    |        |
| No                                                               | 29 ( 3.11) | 902 (96.89)  | 1.11 (0.61 - 2.02) | 0.7297 |
| Yes                                                              | 18 ( 2.81) | 622 (97.19)  | 1.00               |        |
| Syphilis                                                         |            |              |                    |        |
| Yes                                                              | 3 ( 2.24)  | 131 (97.76)  | 0.71 (0.22 - 2.31) | 0.5662 |
| No                                                               | 44 ( 3.14) | 1359 (96.86) | 1.00               |        |
| Region                                                           |            |              |                    |        |
| Americas                                                         | 30 ( 2.67) | 1094 (97.33) | 0.69 (0.38 - 1.27) | 0.2362 |
| South Africa                                                     | 17 ( 3.80) | 430 (96.20)  | 1.00               |        |
| Type of delivery                                                 |            |              |                    |        |
| Cesarean before rupture                                          | 7 ( 1.88)  | 366 (98.12)  | 0.56 (0.25 - 1.27) | 0.1650 |
| Vaginal/ Cesarean after rupture/timing unknown                   | 40 ( 3.29) | 1177 (96.71) | 1.00               |        |
| Gestational age                                                  |            |              |                    |        |
| 32-36 weeks                                                      | 6 ( 3.64)  | 159 (96.36)  | 1.28 (0.53 - 3.05) | 0.5851 |
| 37 weeks or more                                                 | 41 ( 2.88) | 1385 (97.12) | 1.00               |        |
| Time of membrane rupture to infant delivery<br>(hours) by strata |            |              |                    |        |
| <0.5                                                             | 16 ( 2.03) | 771 (97.97)  | 1.00               |        |
| 0.5- <6                                                          | 14 ( 3.51) | 385 (96.49)  | 1.75 (0.85 - 3.63) | 0.1308 |
| 6 - <12                                                          | 4 ( 3.31)  | 117 (96.69)  | 1.65 (0.54 - 5.01) | 0.3792 |
| 12-24                                                            | 5 ( 5.88)  | 80 (94.12)   | 3.01 (1.07 - 8.44) | 0.0360 |
| >24                                                              | 3 ( 7.14)  | 39 (92.86)   | 3.71 (1.04 - 13.3) | 0.0439 |
| Unknown                                                          | 5 ( 3.18)  | 152 (96.82)  | 1.59 (0.57 - 4.39) | 0.3757 |

- 1 All available demographic and clinical variables were tested for association with transmission rate. All variables that were significant at  $p \leq 0.20$  were included in the multivariable regression model. Variables that were not significant were then removed from the model. The backward elimination method was used to select the final model.
- 2 This model used maternal virus load and maternal CD4 cell counts as continuous variables in addition to study treatment arm and illegal substance use. CD4 count was eliminated from the final adjusted model.

Appendix 1: Flow diagram of enrollments

**HIV-Infection Status at Three Months**

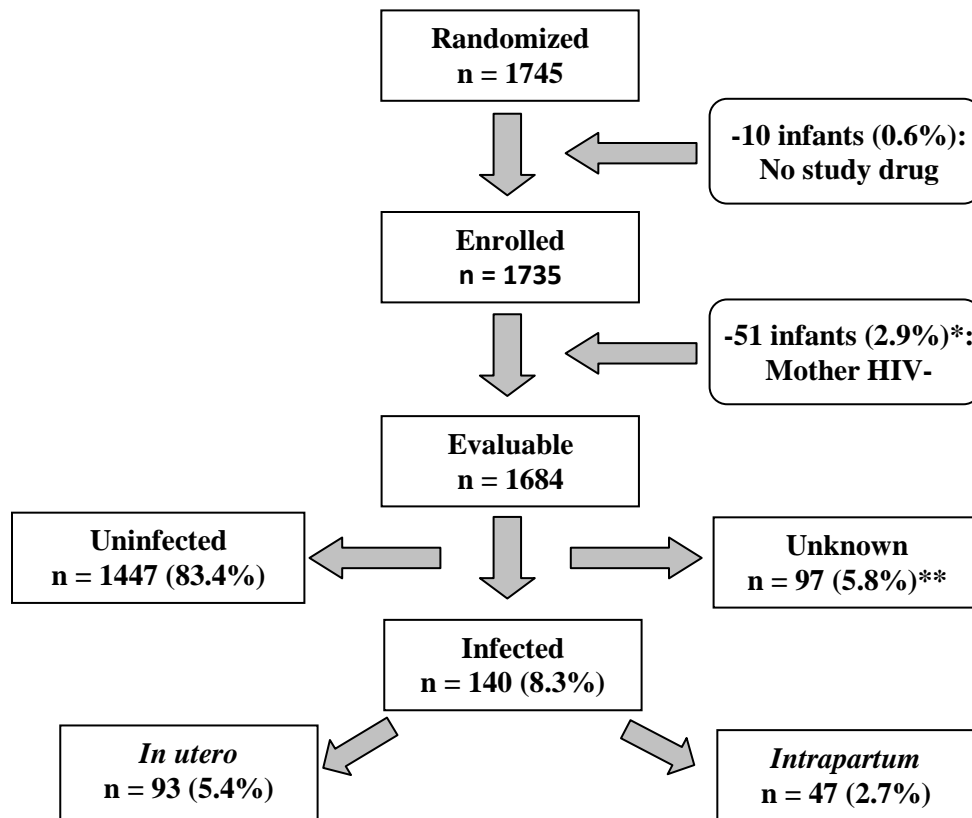



Randomized infants: Mothers signed consent form for study participation and infant received a study treatment assignment.

Enrolled infants: Received study drug

\* There were 15/581 (2.6%) inadvertent enrollments in the ZDV group, 18/580 (3.1%) in the ZDV+NVP group, and 18/574 (3.1%) in the ZDV+3TC/NFV group. These rates were not significantly different ( $p = 0.8346$ , exact chi-square test).

\*\* Ninety-seven infants (5.8%) had unknown HIV-1 status: 31 in the ZDV arm, 33 in the ZDV+NVP arm, 33 in the ZDV+NFV/3TC arm. Reasons for study discontinuation prior to endpoint determination included: death of infant (21), withdrawn consent (37), lost to follow-up (32), subject relocated (6), and other reasons (1). Two infants (1 in the ZDV arm, 1 in the ZDV+NVP arm) had a positive DNA test at birth but no subsequent specimens.

Appendix 2: Mortality Table

| Treatment Arm | Observation No. | HIV Status             | Age at Death (days) | <sup>1</sup> Cause of Death                |
|---------------|-----------------|------------------------|---------------------|--------------------------------------------|
| ZDV           | 1               | Infected - In Utero    | 123                 | Multi-Organ Failure                        |
| ZDV           | 2               | Infected - In Utero    | 102                 | Pneumocystis Carinii Pneumonia<br>Sepsis   |
| ZDV           | 3               | Infected - In Utero    | 145                 | Sepsis                                     |
| ZDV           | 4               | Infected - Intrapartum | 106                 | Sepsis                                     |
| ZDV           | 5               | Uninfected             | 150                 | Bronchiolitis<br>Encephalitis<br>Pneumonia |
| ZDV           | 6               | Unknown                | 81                  | Sepsis                                     |
| ZDV           | 7               | Unknown                | 76                  | Diarrhea                                   |
| ZDV           | 8               | Unknown                | 97                  | Gastroenteritis                            |
| ZDV           | 9               | Unknown                | 34                  | Pneumonia Aspiration                       |
| ZDV           | 10              | Unknown                | 15                  | Pneumonia Aspiration                       |
| ZDV           | 11              | Unknown                | 26                  | Sudden Infant Death Syndrome               |
| ZDV+NVP       | 1               | Infected - In Utero    | 151                 | Pneumonia                                  |
| ZDV+NVP       | 2               | Infected - In Utero    | 44                  | Respiratory Failure                        |
| ZDV+NVP       | 3               | Infected - In Utero    | 83                  | Respiratory Tract Infection                |
| ZDV+NVP       | 4               | Infected - In Utero    | 121                 | Sudden Infant Death Syndrome               |
| ZDV+NVP       | 5               | Infected - Intrapartum | 152                 | Respiratory Distress                       |

| Treatment Arm | Observation No. | HIV Status          | Age at Death (days) | <sup>1</sup> Cause of Death                       |
|---------------|-----------------|---------------------|---------------------|---------------------------------------------------|
| ZDV+NVP       | 6               | Uninfected          | 131                 | Sudden Infant Death Syndrome                      |
| ZDV+NVP       | 7               | Uninfected          | 139                 | Gastroenteritis                                   |
| ZDV+NVP       | 8               | Uninfected          | 103                 | Vomiting                                          |
| ZDV+NVP       | 9               | Uninfected          | 196                 | Bronchopneumonia                                  |
| ZDV+NVP       | 10              | Unknown             | 53                  | Pneumonia Aspiration                              |
| ZDV+NVP       | 11              | Unknown             | 12                  | Respiratory Failure                               |
| ZDV+NVP       | 12              | Unknown             | 36                  | Septic Shock                                      |
| ZDV+NVP       | 13              | Unknown             | 9                   | Renal Failure                                     |
| ZDV+NVP       | 14              | Unknown             | 80                  | Pulmonary Tuberculosis                            |
| ZDV+NVP       | 15              | Unknown             | 26                  | Respiratory Tract Infection                       |
| ZDV+NFV/3TC   | 1               | Infected - In Utero | 175                 | Anemia<br>Pneumonia<br>Sepsis<br>Thrombocytopenia |
| ZDV+NFV/3TC   | 2               | Infected - In Utero | 95                  | Asphyxia                                          |
| ZDV+NFV/3TC   | 3               | Infected - In Utero | 95                  | Pneumonia                                         |
| ZDV+NFV/3TC   | 4               | Infected - In Utero | 141                 | Dyspnea                                           |
| ZDV+NFV/3TC   | 5               | Infected - In Utero | 75                  | Sudden Infant Death Syndrome                      |
| ZDV+NFV/3TC   | 6               | Infected - In Utero | 60                  | Diarrhea<br>Vomiting                              |

| Treatment Arm | Observation No. | HIV Status          | Age at Death (days) | <sup>1</sup> Cause of Death            |
|---------------|-----------------|---------------------|---------------------|----------------------------------------|
| ZDV+NFV/3TC   | 7               | Infected - In Utero | 116                 | Diarrhea                               |
| ZDV+NFV/3TC   | 8               | Uninfected          | 149                 | Pneumonia                              |
| ZDV+NFV/3TC   | 9               | Unknown             | 23                  | Sepsis                                 |
| ZDV+NFV/3TC   | 10              | Unknown             | 6                   | Ileus<br>Meningitis<br>Sepsis Neonatal |
| ZDV+NFV/3TC   | 11              | Unknown             | 48                  | Sudden Infant Death Syndrome           |
| ZDV+NFV/3TC   | 12              | Unknown             | 4                   | Hematochezia                           |
| ZDV+NFV/3TC   | 13              | Unknown             | 10                  | Sudden Infant Death Syndrome           |
| ZDV+NFV/3TC   | 14              | Unknown             | 26                  | Sepsis                                 |
| ZDV+NFV/3TC   | 15              | Unknown             | 130                 | Sudden Infant Death Syndrome           |
| ZDV+NFV/3TC   | 16              | Unknown             | 1                   | Congenital Syphilis                    |
| ZDV+NFV/3TC   | 17              | Unknown             | 81                  | Sudden Infant Death Syndrome           |

<sup>1</sup>Infants could have more than one cause of death.

Appendix 3: All Grade 2 or higher laboratory abnormalities overall and by study arm

|                                                 | Overall<br>N= 1684           | ZDV<br>N= 566                | ZDV + NVP<br>N= 562          | ZDV + 3TC/NFV<br>N= 556      | <i>p-value</i> <sup>2</sup> |
|-------------------------------------------------|------------------------------|------------------------------|------------------------------|------------------------------|-----------------------------|
|                                                 | No. Events<br>(No. Subjects) | No. Events<br>(No. Subjects) | No. Events<br>(No. Subjects) | No. Events<br>(No. Subjects) |                             |
| Neutropenia                                     | 407 (330)                    | 116 (93)                     | 109 (84)                     | 182 (153)                    | < 0.0001                    |
| Alanine<br>Aminotransferase (ALT)<br>increase   | 40 (34)                      | 15 (13)                      | 16 (13)                      | 9 (8)                        | 0.49                        |
| Aspartate<br>Aminotransferase (AST)<br>increase | 46 (43)                      | 20 (18)                      | 11 (11)                      | 15 (14)                      | 0.43                        |
| Anemia                                          | 822 (432)                    | 294 (153)                    | 237 (132)                    | 291 (147)                    | 0.35                        |
| Thrombocytopenia <sup>1</sup>                   | 33 (26)                      | 11 (9)                       | 9 (7)                        | 13 (10)                      | 0.75                        |
| Total                                           | 1348 (865)                   | 456 (286)                    | 382 (247)                    | 510 (332)                    |                             |

<sup>1</sup>Thrombocytopenia values of 75,000 or less are included in the table.

<sup>2</sup>Chi square tests were used to calculate p-values.

Appendix 4: All SAE by System Organ Class and Study Treatment Arm

| Serious Adverse Event By System Organ Class                           | Overall<br>(infants enrolled=1684) |        | ZDV<br>(infants enrolled=566) |        | ZDV + NVP<br>(infants enrolled=562) |        | ZDV + 3TC + NFV<br>(infants enrolled=556) |        | p-value <sup>2</sup> |
|-----------------------------------------------------------------------|------------------------------------|--------|-------------------------------|--------|-------------------------------------|--------|-------------------------------------------|--------|----------------------|
|                                                                       | Infants <sup>1</sup>               | Events | Infants <sup>1</sup>          | Events | Infants <sup>1</sup>                | Events | Infants <sup>1</sup>                      | Events |                      |
| Blood and lymphatic system disorders                                  | 255                                | 310    | 86                            | 95     | 59                                  | 76     | 110                                       | 139    | 0.0001               |
| Cardiac disorders                                                     | 10                                 | 11     | 2                             | 2      | 4                                   | 5      | 4                                         | 4      | 0.6776               |
| Congenital, familial and genetic disorders                            | 167                                | 177    | 53                            | 56     | 62                                  | 65     | 52                                        | 56     | 0.5559               |
| Eye disorders                                                         | 1                                  | 1      | 0                             | 0      | 1                                   | 1      | 0                                         | 0      | 0.6639               |
| Gastrointestinal disorders                                            | 25                                 | 29     | 7                             | 8      | 5                                   | 5      | 13                                        | 16     | 0.1126               |
| General disorders and administration site conditions                  | 22                                 | 22     | 8                             | 8      | 8                                   | 8      | 6                                         | 6      | 0.8467               |
| Hepatobiliary disorders                                               | 18                                 | 19     | 11                            | 12     | 4                                   | 4      | 3                                         | 3      | 0.0440               |
| Infections and infestations                                           | 257                                | 356    | 82                            | 120    | 88                                  | 122    | 87                                        | 114    | 0.8209               |
| Injury, poisoning and procedural complications                        | 6                                  | 6      | 0                             | 0      | 3                                   | 3      | 3                                         | 3      | 0.2028               |
| Investigations                                                        | 46                                 | 73     | 20                            | 31     | 12                                  | 19     | 14                                        | 23     | 0.3299               |
| Metabolism and nutrition disorders                                    | 36                                 | 50     | 13                            | 18     | 12                                  | 16     | 11                                        | 16     | 0.9343               |
| Neoplasms benign, malignant and unspecified (includes cysts & polyps) | 1                                  | 1      | 0                             | 0      | 0                                   | 0      | 1                                         | 1      | 0.3302               |
| Nervous system disorders                                              | 11                                 | 13     | 5                             | 6      | 4                                   | 5      | 2                                         | 2      | 0.6462               |
| Pregnancy, puerperium and perinatal conditions                        | 52                                 | 55     | 18                            | 18     | 10                                  | 12     | 24                                        | 25     | 0.0489               |
| Renal and urinary disorders                                           | 3                                  | 3      | 1                             | 1      | 1                                   | 1      | 1                                         | 1      | 1.0000               |
| Respiratory, thoracic and mediastinal disorders                       | 30                                 | 34     | 8                             | 10     | 14                                  | 15     | 8                                         | 9      | 0.2969               |
| Skin and subcutaneous tissue disorders                                | 2                                  | 2      | 0                             | 0      | 1                                   | 1      | 1                                         | 1      | 0.5535               |
| Social circumstances                                                  | 50                                 | 50     | 12                            | 12     | 13                                  | 13     | 25                                        | 25     | 0.0341               |
| Surgical and medical procedures                                       | 1                                  | 1      | 0                             | 0      | 1                                   | 1      | 0                                         | 0      | 0.6639               |
| Vascular disorders                                                    | 3                                  | 3      | 1                             | 1      | 0                                   | 0      | 2                                         | 2      | 0.3298               |

|                                             | Overall                 |        | ZDV                    |        | ZDV + NVP              |        | ZDV + 3TC + NFV        |        |                      |
|---------------------------------------------|-------------------------|--------|------------------------|--------|------------------------|--------|------------------------|--------|----------------------|
|                                             | (infants enrolled=1684) |        | (infants enrolled=566) |        | (infants enrolled=562) |        | (infants enrolled=556) |        |                      |
| Serious Adverse Event By System Organ Class | Infants <sup>1</sup>    | Events | Infants <sup>1</sup>   | Events | Infants <sup>1</sup>   | Events | Infants <sup>1</sup>   | Events | p-value <sup>2</sup> |
| Total                                       | 675<br>(40%)            | 1216   | 219<br>(38.7%)         | 398    | 208<br>(37.0%)         | 372    | 248<br>(44.6%)         | 446    |                      |

<sup>1</sup> For a specific system organ class, the 'infants' column gives the number of infants with SAEs corresponding to that term. In the 'total' row, the 'infants' column gives the number of infants with one or more SAEs of any type. Since an infant may have more than one type of SAE, the entries in the 'infants' column for the system organ classes do not sum to the number with one or more SAEs.

<sup>2</sup> P-value is from the Chi square test comparing the difference in number of subjects with at least one SAE among three treatment arms.

Acknowledgment of additional members of the NICHD/HPTN 040/PACTG 1043 protocol team:

Argentina, Buenos Aires- Foundation for Maternal and Infant Health (FUNDASAMIN): Edgardo Szyld, Silvia Marzo. Brazil, Belo Horizonte- Federal University of Minas Gerais: Flavia Faleiro Ferreira, Fabiana Kakehasi. Porto Alegre-Hospital Nossa Senhora da Conceicao: Rita Lira. Porto Alegre-Hospital Femina: Carla Franceschini de Fraga Rita Lira. Porto Alegre-Irmandade da Santa Casa de Misericordia de Porto Alegre: Debora Fernandes Coelho, Alberto Sanseverino, Luis Carlos Ribeiro. Rio de Janeiro-Hospital dos Servidores do Estado: M. Leticia Santos Cruz, Ezequias Martins, Jacqueline Anita de Menezes, Luisa Andrea Torres Salgado. Rio de Janeiro- Hospital Geral de Nova Iguaçu: Ana Valeria Cordovil, Andréa Gouveia, Priscila Mazzucanti, Jorge Eurico Ribeiro. Sao Paulo-Universidade de Sao Paulo: Geraldo Duarte, Adriana Aparecida Tiraboschi Barbaro, Carolina Sales Vieira. Sao Paulo- Universidade Federal de Sao Paulo: Regina Succi. South Africa, Capetown-Stellenbosch University and Tygerberg Hospital: Mark Cotton, Jeanne Louw, Elke Maritz. Johannesburg-Perinatal HIV Research Unit, University of Witwatersrand and Chris Hani Baragwanath Hospital: Sarita Lalsab, Shini Legoete, James Alasdair McIntyre, Mandisa Nyati. United States, Baltimore-Johns Hopkins University: Allison Agwu, Jean Anderson, Joan Bess, Jonathan Ellen, Todd Noletto, Nancy Hutton. Gainesville-Shands Hospital: Carol Delany, Robert M. Lawrence. Jacksonville-University of Florida: Chas Griggs, Mobeen Rathore, Kathleen Thoma, Michelle Tucker. Long Beach- Miller Childrens Hospital: Audra Deveikis, Susan Marks. Newark-University Medical and Dental School of NJ: Linda Bettica, James M. Oleske. San Juan City-San Juan City Hospital: Midnela Acevedo Flores, Elvia Pérez. Oswaldo Cruz Foundation, Rio de Janeiro (FIOCRUZ):, Marilia Santini de Oliveira, Monica Derrico, Valéria Ribeiro, Thiago Torres e FIOTEC (Fundação para o Desenvolvimento Científico e Tecnológico). Westat, Inc.: Emmanuel Aluko, Yolanda Bertucci, Jennifer Bryant, Patty Chen, Barbara Driver, Ruby Duston, Adriana Ferreira, Priya Guyadeen, Sarah Howell, Marsha Johnson, Linda Kaufman, Naomi Leshabane, Lilya Meyerson, Rita Patel, Lubima Petrova, Georgine Price, Susan Raitt, Scott Watson, Yiling Xu, Eunice Yu. Other protocol team members included Jennifer Read from the Eunice Kennedy Shriver National Institute of Child Health and Human Development (NICHD), Elizabeth Smith and Sheryl Zwierski from the National Institute of Allergy and Infectious Diseases (NIAID).
